# Supplementary material
Source: PubMed Central journal article supplement (PMC8373249)
Supplement: aac.00277-21-s0001.pdf [file aac.00277-21-s0001.pdf]

1 **Diversity of sequence types and impact of fitness cost among carbapenem-resistant**  
2 ***Acinetobacter baumannii* isolates from Tripoli, Libya**

3 Antoine G. Abou Fayad<sup>1,2,3§</sup> Louis-Patrick Haraoui<sup>4§</sup>, Ahmad Sleiman<sup>1,2,3</sup>, Mohamad Jaafar<sup>1,2,3</sup>,  
4 Abdulaziz Zorgani<sup>5</sup>, Ghassan M. Matar<sup>1,2,3\*</sup>, Paul G. Higgins<sup>6,7\*</sup>

5 <sup>1</sup>*Department of Experimental Pathology, Immunology and Microbiology, Faculty of Medicine,*  
6 *American University of Beirut, Beirut, Lebanon*

7 <sup>2</sup>*Center for Infectious Diseases Research, American University of Beirut, Beirut, Lebanon*

8 <sup>3</sup>*World Health Organization (WHO) Collaborating Center for Reference and Research on*  
9 *Bacterial Pathogens, Beirut, Lebanon*

10 <sup>4</sup>*Department of Microbiology and Infectious Diseases, Faculty of Medicine and Health Sciences,*  
11 *Université de Sherbrooke, Sherbrooke, QC, Canada*

12 <sup>5</sup>*National Center for Disease Control Lybia. Reference Laboratory, Tripoly, Lybia*

13 <sup>6</sup>*Institute for Medical Microbiology, Immunology and Hygiene, University of Cologne, Germany*

14 <sup>7</sup>*German Centre for Infection Research (DZIF), Partner Site Bonn-Cologne, Cologne, Germany*

15 **Supplementary data**

16

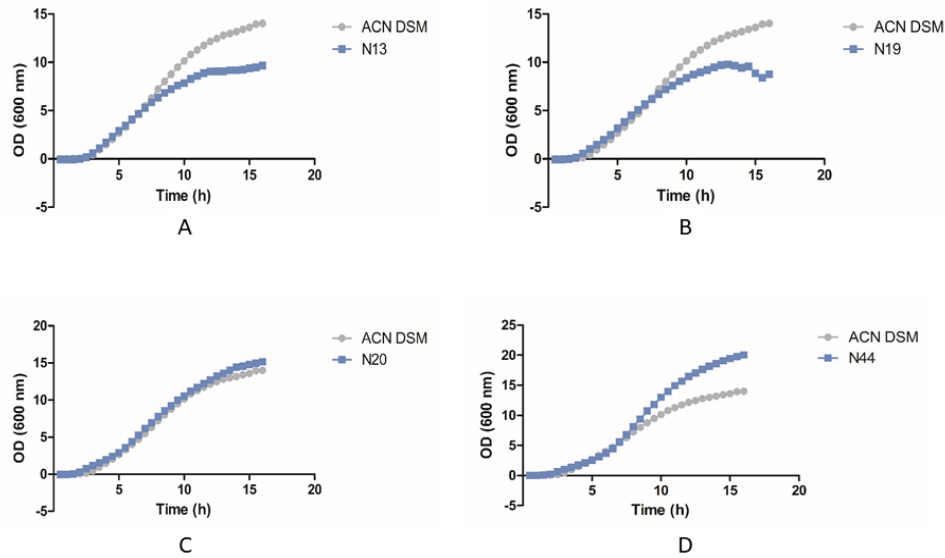

17

18 Figure S1: Fitness cost of isolates N13, N19, N20, and N44 that belong to IC1, ST1 compared to *A. baumannii*  
 19 DSM30008

20

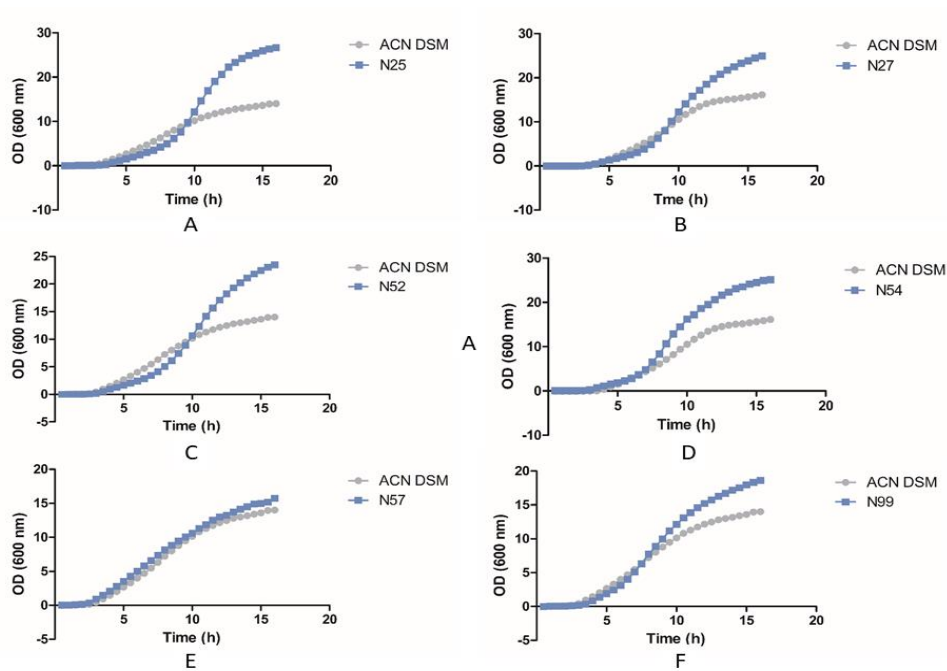

21

22 Figure S2: Fitness cost of isolates N25, N27, N52, N54, N57, and N99 that belong to IC2, ST2 compared to *A.*  
 23 *baumannii* DSM30008

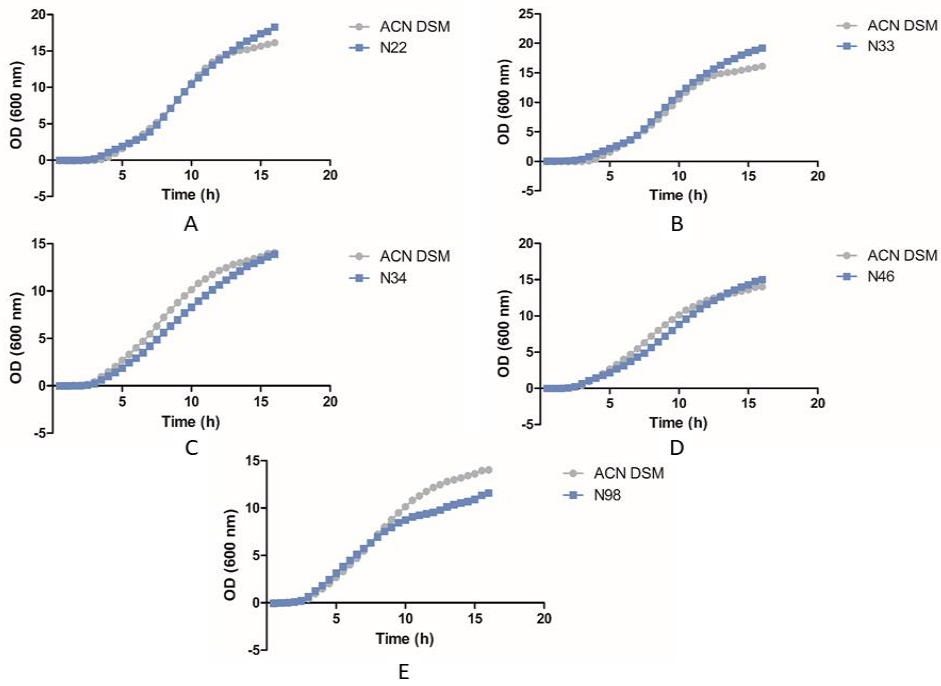

24

25 Figure S3: Fitness cost of isolates N22, N33, N34, N46, and N98 that belong to IC7, ST25 compared to *A.*  
 26 *baumannii* DSM30008

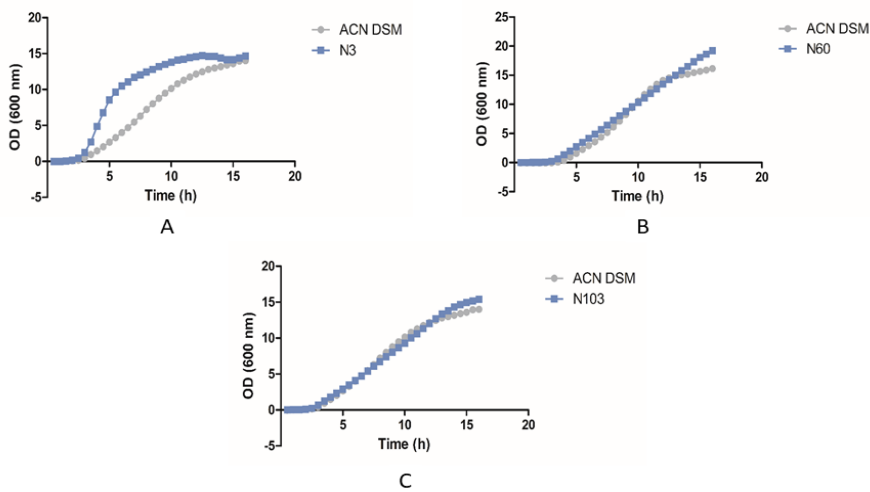

27

28 Figure S4: Fitness cost of isolates N3, N60, and N103 that belong to ST602 compared to *A. baumannii* DSM30008

29

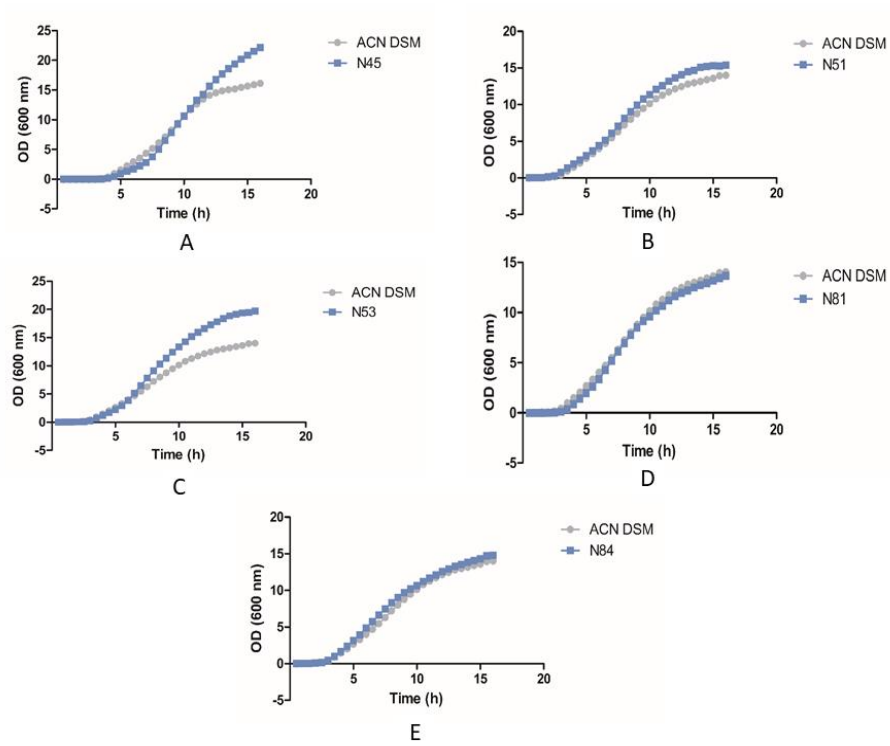

30

31 Figure S5: Fitness cost of isolates N45, N51, and N53, N81, and N84 that belong to ST136 compared to A.

32 *baumannii* DSM30008

33
